# Supplementary material for: Inulin Fermentable Fiber Ameliorates Type I Diabetes via IL22 and Short-Chain Fatty Acids in Experimental Models
Source: PubMed Central journal article supplement — Cell Mol Gastroenterol Hepatol. 2021 Apr 30;12(3):983–1000. doi: 10.1016/j.jcmgh.2021.04.014 (PMC8346662; doi:10.1016/j.jcmgh.2021.04.014), 2021-04-30
Supplement: mmc1.pdf [file mmc1.pdf]

**Supplemental table 1.** Compositionally defined diet used in this study

| Product #                             | D12450J       |             | D13081108     |             | D13081109      |             |
|---------------------------------------|---------------|-------------|---------------|-------------|----------------|-------------|
|                                       | CDD           |             | CDD: Inul     |             | CDD: Cell      |             |
|                                       | gm%           | kcal%       | gm%           | kcal%       | gm%            | kcal%       |
| Protein                               | 19            | 20          | 18            | 20          | 17             | 20          |
| Carbohydrate                          | 67            | 70          | 74            | 70          | 59             | 70          |
| Fat                                   | 4             | 10          | 4             | 10          | 4              | 10          |
| Total                                 |               | 100         |               | 100         |                | 100         |
| kcal/gm                               | 3.8           |             | 3.5           |             | 3.37           |             |
|                                       |               |             |               |             |                |             |
| Ingredient                            | gm            | kcal        | gm            | kcal        | gm             | kcal        |
| Casein                                | 200           | 800         | 200           | 800         | 200            | 800         |
| L-Cystine                             | 3             | 12          | 3             | 12          | 3              | 12          |
|                                       |               |             |               |             |                |             |
| Corn Starch                           | 506.2         | 2025        | 456.2         | 1825        | 506.2          | 2025        |
| Maltodextrin 10                       | 125           | 500         | 125           | 500         | 125            | 500         |
| Sucrose                               | 68.8          | 275         | 68.8          | 275         | 63.8           | 255         |
|                                       |               |             |               |             |                |             |
| Cellulose, BW200                      | 50            | 0           | 0             | 0           | 200            | 0           |
| Inulin                                | 0             | 0           | 200           | 200         | 0              | 0           |
|                                       |               |             |               |             |                |             |
| Soybean Oil                           | 25            | 225         | 25            | 225         | 25             | 225         |
| Lard                                  | 20            | 180         | 20            | 180         | 20             | 180         |
|                                       |               |             |               |             |                |             |
| Mineral Mix, S10026                   | 10            | 0           | 10            | 0           | 10             | 0           |
| DiCalcium Phosphate                   | 13            | 0           | 13            | 0           | 13             | 0           |
| Calcium Carbonate                     | 5.5           | 0           | 5.5           | 0           | 5.5            | 0           |
| Potassium Citrate, 1 H <sub>2</sub> O | 16.5          | 0           | 16.5          | 0           | 16.5           | 0           |
|                                       |               |             |               |             |                |             |
| Vitamin Mix, V10001                   | 10            | 40          | 10            | 40          | 10             | 40          |
| Choline Bitartrate                    | 2             | 0           | 2             | 0           | 2              | 0           |
|                                       |               |             |               |             |                |             |
| FD&C Yellow Dye #5                    | 0.04          | 0           | 0.025         | 0           | 0              | 0           |
| FD&C Red Dye #40                      | 0             | 0           | 0             | 0           | 0              | 0           |
| FD&C Blue Dye #1                      | 0.01          | 0           | 0.025         | 0           | 0.05           | 0           |
|                                       |               |             |               |             |                |             |
| <b>Total</b>                          | <b>1055.1</b> | <b>4057</b> | <b>1155.1</b> | <b>4057</b> | <b>1205.05</b> | <b>4057</b> |
